# Supplementary material
Source: MDPI journal article supplement (https://www.mdpi.com/2076-3417/11/7/2954)
Supplement: s1 [file s1]

**Supplementary materials for**  
**On the set of Fellini's movies:**  
**investigating and preserving multi-material stage costumes exploiting**  
**spectroscopic and mass spectrometric techniques**

Francesca Sabatini

University of Pisa, Department of Chemistry and Industrial Chemistry  
Via Moruzzi, 13, I-56126 Pisa (Italy)  
f.sabatini4@gmail.com

Jacopo La Nasa

University of Pisa, Department of Chemistry and Industrial Chemistry  
Via Moruzzi, 13, I-56126 Pisa (Italy)  
jacopo.lanasa@for.unipi.it

Camilla Guerrini

University of Pisa, Department of Chemistry and Industrial Chemistry  
Via Moruzzi, 13, I-56126 Pisa (Italy)  
kamill.96@hotmail.it

Francesca Modugno \*

University of Pisa, Department of Chemistry and Industrial Chemistry  
Via Moruzzi, 13, I-56126 Pisa (Italy)  
francesca.modugno@unipi.it

Sara Bonadio

Opificio delle Pietre Dure  
Via Alfani, 78, I-50121 Firenze (Italy)  
sara.bonadio@virgilio.it

Federica Ursino

Opificio delle Pietre Dure  
Via Alfani, 78, I-50121 Firenze (Italy)  
derikkia@hotmail.it

Isetta Tosini

Opificio delle Pietre Dure  
Via Alfani, 78, I-50121 Firenze (Italy)  
isetta.tosini@beniculturali.it

Maria Perla Colombini

University of Pisa, Department of Chemistry and Industrial Chemistry  
Via Moruzzi, 13, I-56126 Pisa (Italy)  
maria.perla.colombini@unipi.it

Ilaria Degano\*

University of Pisa, Department of Chemistry and Industrial Chemistry  
Via Moruzzi, 13, I-56126 Pisa (Italy)  
ilaria.degano@unipi.it

**Table S1:** Sample list with relative sampling point and analysis performed.

|                    | Sample | Sampling point                                 | FTIR | SEM-EDX | Py/GC-MS | HPLC-DAD-MS |
|--------------------|--------|------------------------------------------------|------|---------|----------|-------------|
| <b>Il Casanova</b> | C1     | Warp                                           | -    | X       | X        | X           |
|                    | C2     | Lace applied on the neckline                   | X    | X       | X        | X           |
|                    | C3     | Volant applied on the sleeve                   | -    | X       | -        | X           |
|                    | C4     | Corset                                         | -    | X       | -        | X           |
|                    | C5     | Decoration of the hat                          | -    | X       | X        | X           |
|                    | C7     | Lace applied on the sleeve                     | -    | X       | X        | X           |
|                    | C8     | Right sleeve of the corset                     | X    | X       | X        | -           |
|                    | C9     | Lace applied on the right side of the neckline | X    | -       | -        | -           |
|                    | C10    | Volant applied on the left sleeve              | X    | X       | -        | -           |
|                    | C11    | Corset decoration on the right side            | X    | X       | X        | -           |
|                    | C12    | Trimming on the left side of the neckline      | X    | X       | -        | -           |
|                    | C13    | Lace applied on the sleeve                     | X    | -       | -        | -           |
|                    | C14    | Decoration of the top part of the hat          | X    | X       |          |             |
| <b>Rome</b>        | T      | Lining of the tunic                            | X    | -       | X        | X           |
|                    | P      | Inside trimming of the chasuble                | X    | -       | X        | X           |

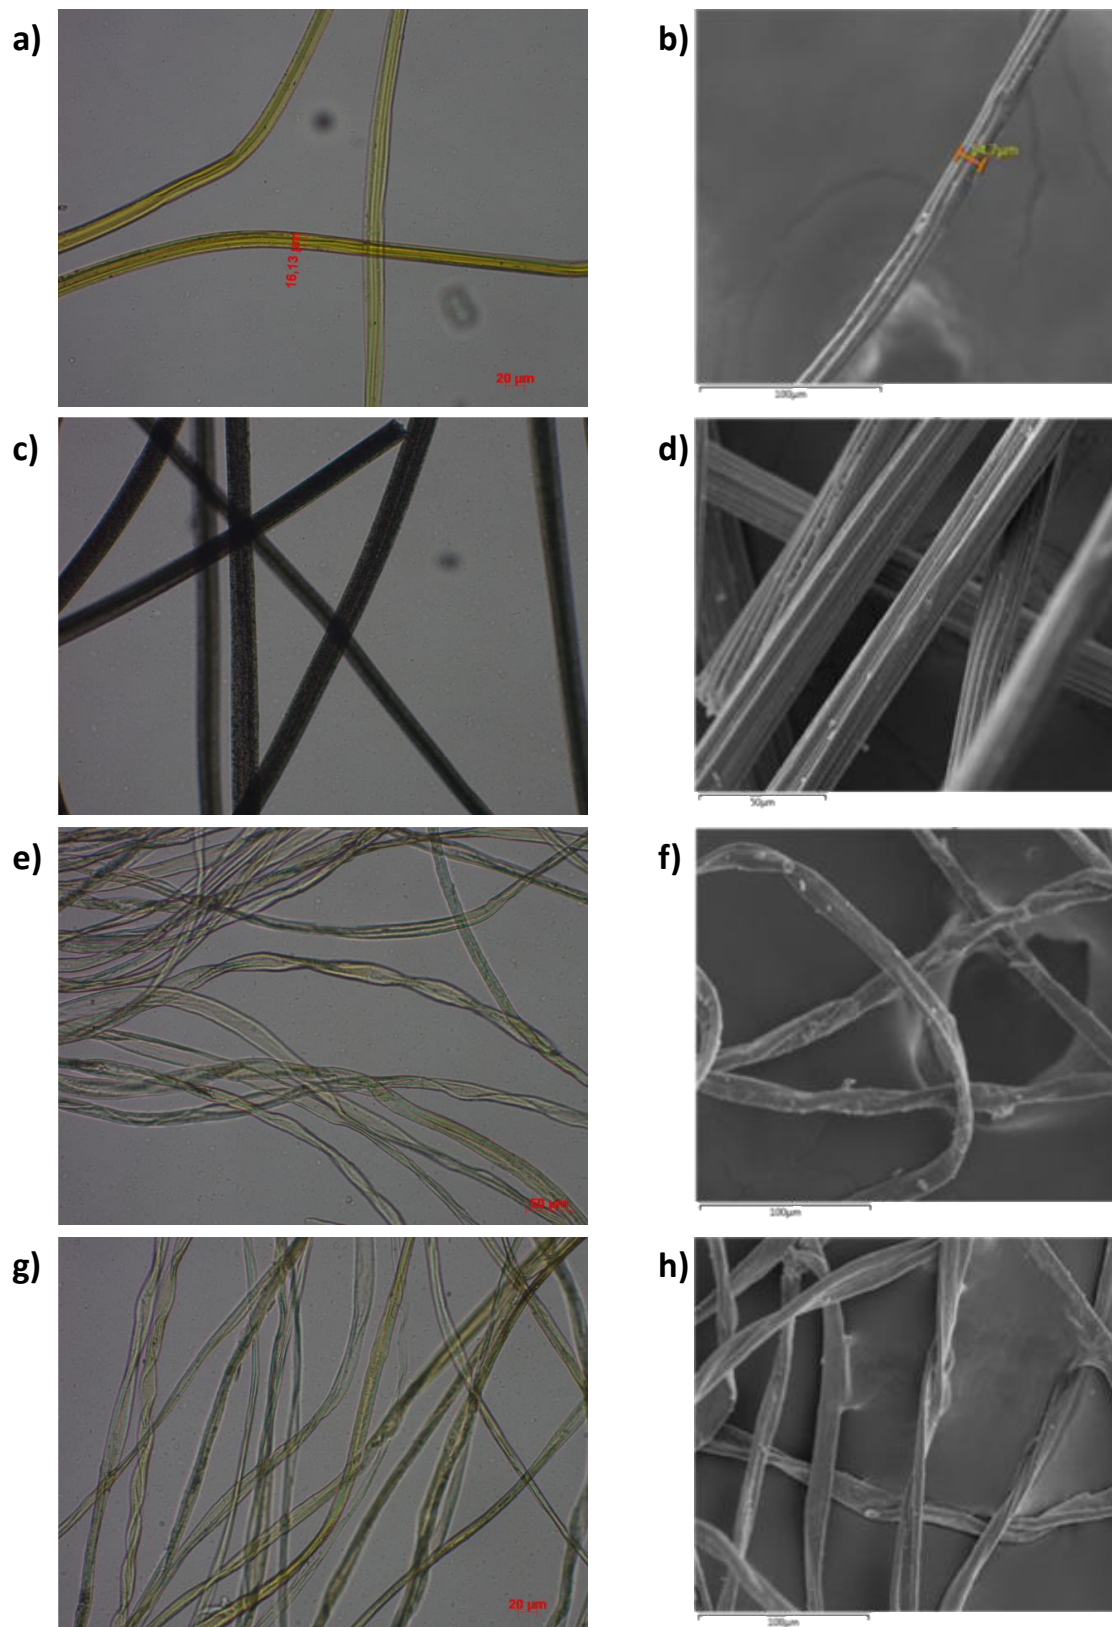

**Figure S1:** 10x OM images and Secondary Electron images (SE) of samples: C1 (**a** and **b**); C2 (**c** and **d**); C3 (**e** and **f**); C4 (**g** and **h**).

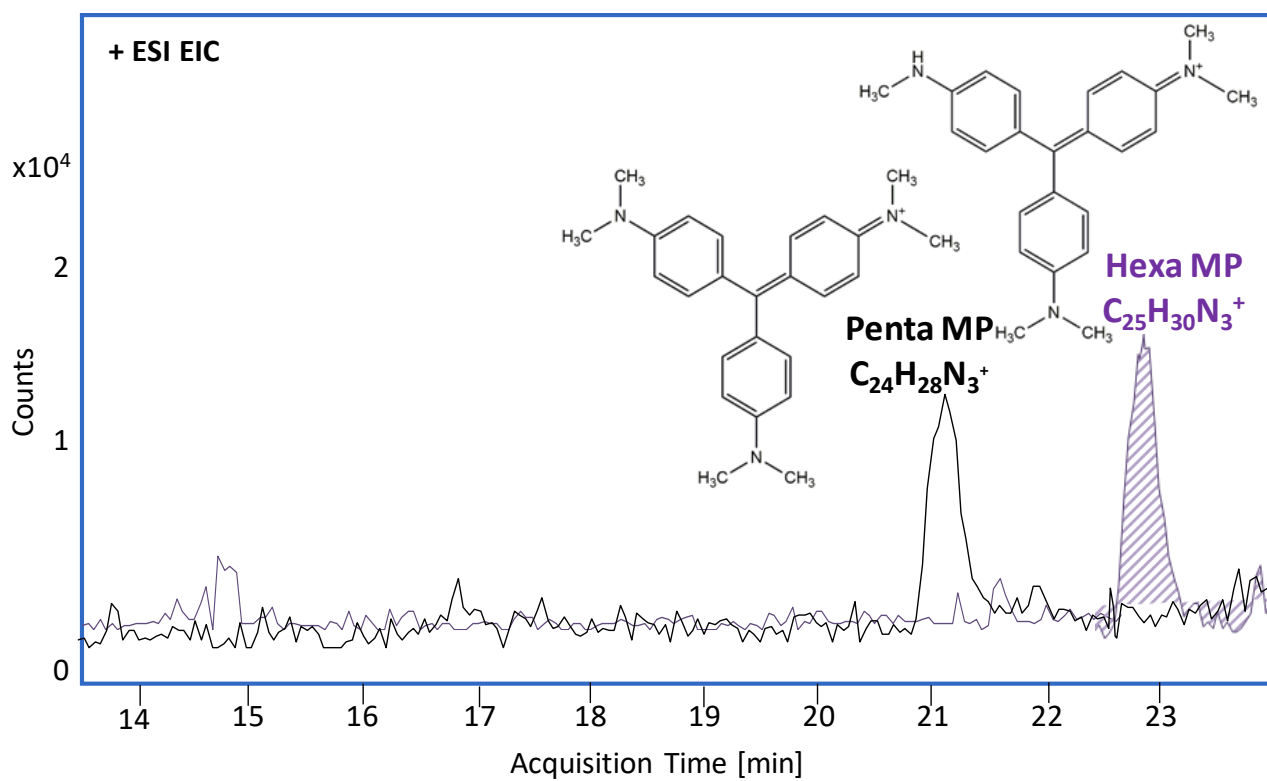

**Figure S2:** LC-ESI-Q-ToF EIC of  $C_{24}H_{28}N_3^+$  (penta-N-methyl pararosaniline) and  $C_{25}H_{30}N_3^+$  (hexa-N-methyl pararosaniline) from extracts of sample C5. Positive acquisition mode.

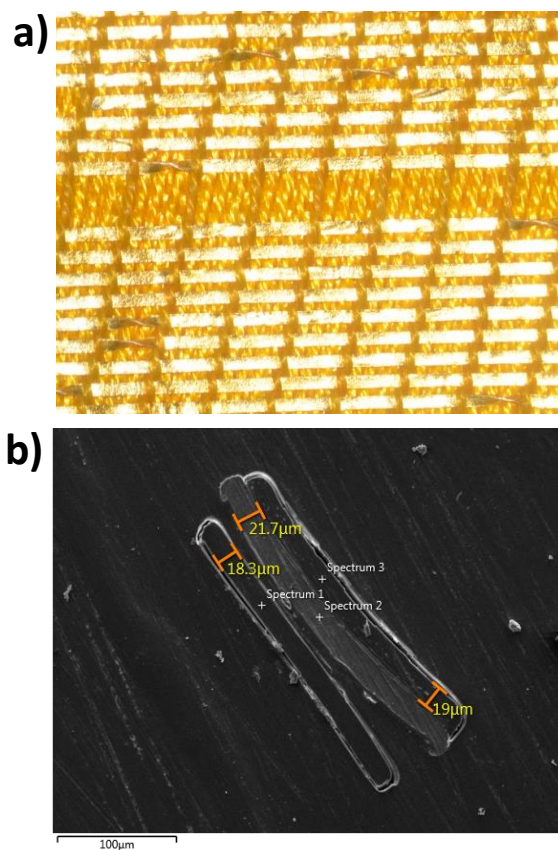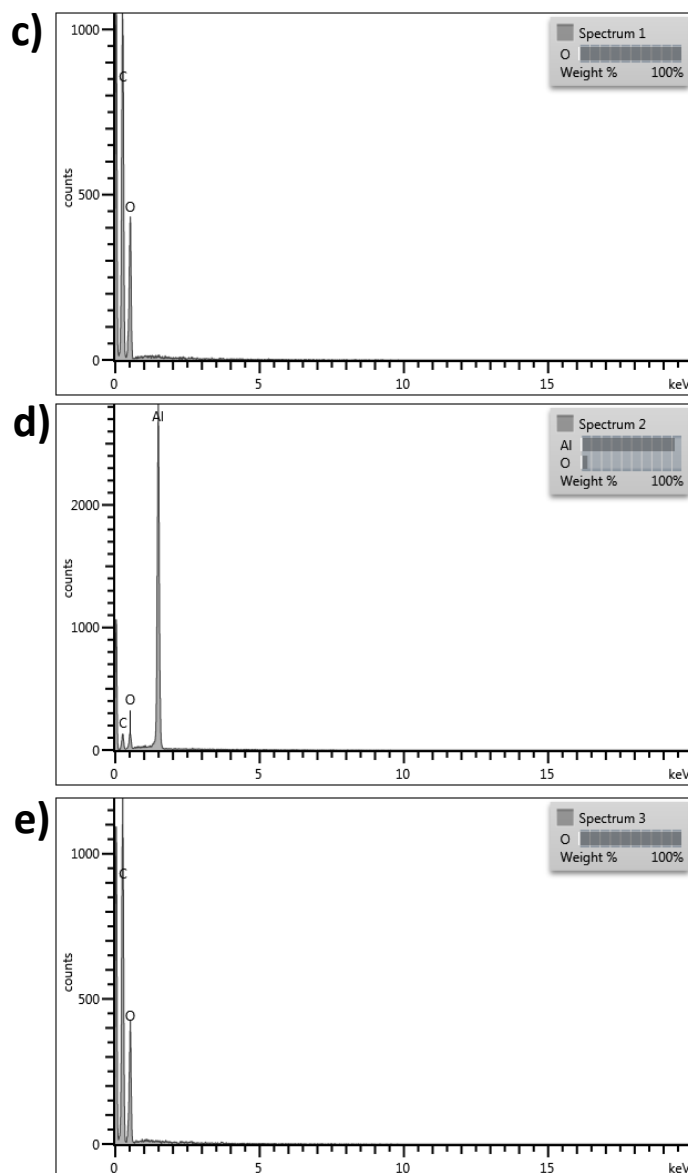

**Figure S3: a)** OM image of sample C8; **b)** Secondary Electron image (SE) of sample C8; **c)** EDX spectrum of the point labeled as 1 in **b)**; **d)** EDX spectrum of the point labeled as 2 in **b)**; **e)** EDX spectrum of the point labeled as 3 in **b)**

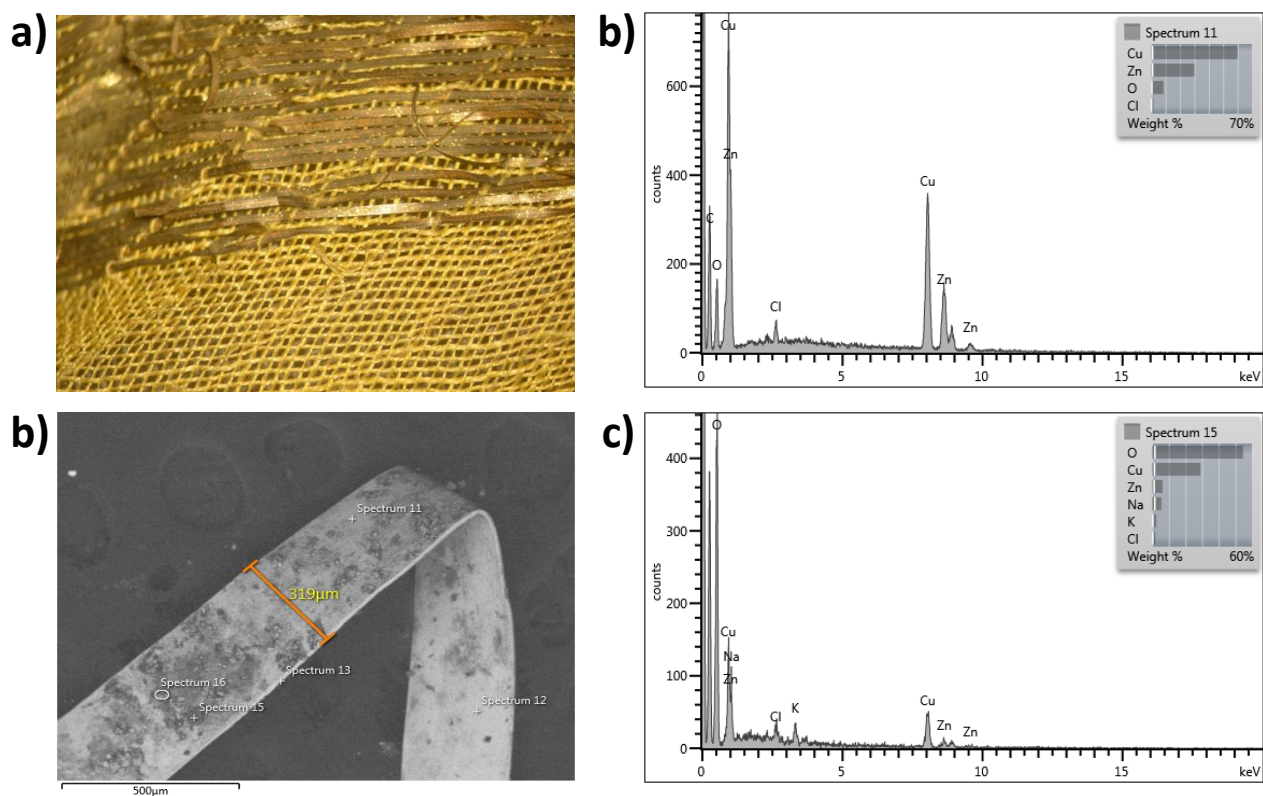

**Figure S4: a)** OM image of sample C11; **b)** Secondary Electron image (SE) of sample C11; **c)** EDX spectrum of the point labeled as 11 in **b)**; **d)** EDX spectrum of the point labeled as 15 in **b)**.

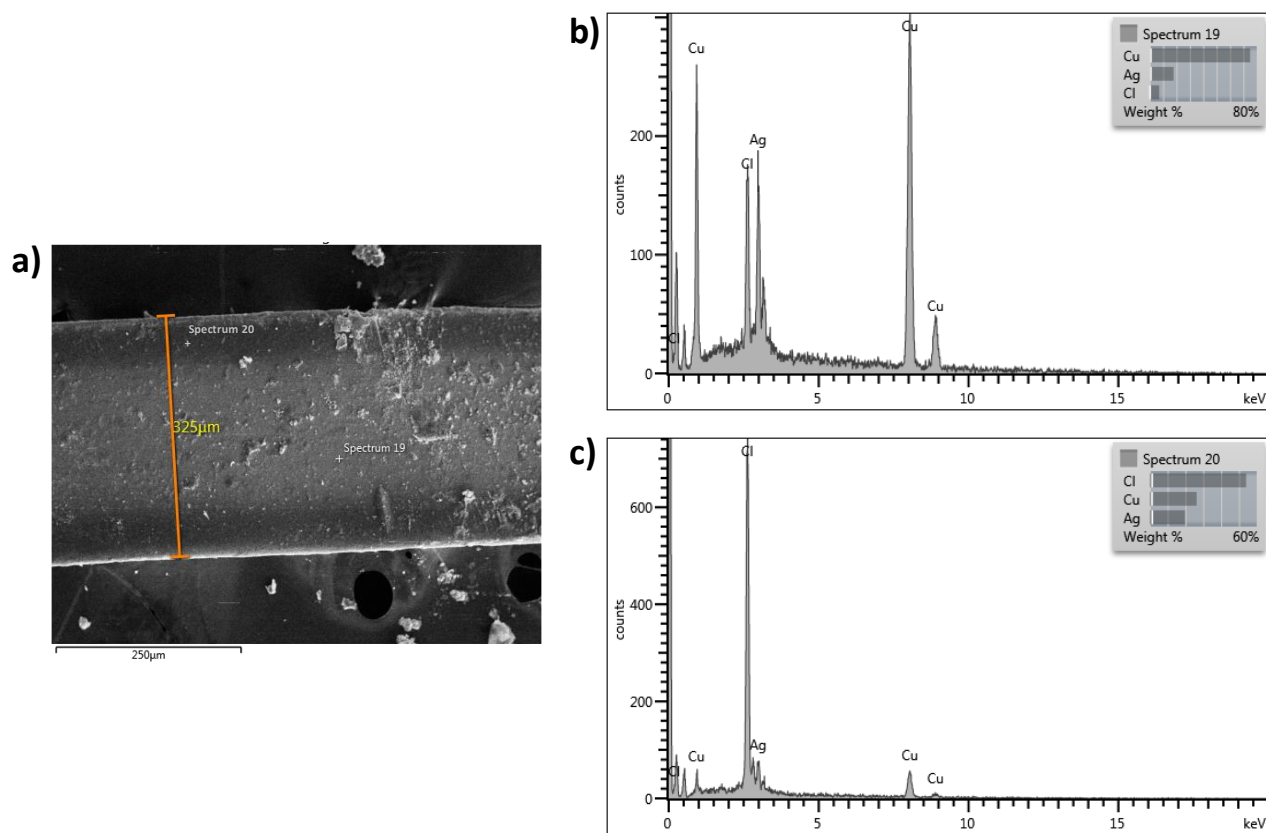

**Figure S5: a)** Secondary Electron image (SE) of sample C14; **b)** EDX spectrum of the point labeled as 19 in **a)**; **c)** EDX spectrum of the point labeled as 20 in **a)**.
